# Supplementary material for: Facile synthesis of biodegradable and clickable polymer
Source: Royal Society of Chemistry journal article supplement (doi:10.1039/c4ra00829d), 2014-01-01
Supplement: c4ra00829d1.pdf [file c4ra00829d1.pdf]

## Supporting Information

### Facile Synthesis of Biodegradable and Clickable Polymer

Hongjun Yang,<sup>†</sup> Jun Ge,<sup>†</sup> Wenyan Huang,<sup>†</sup> Xiaoqiang Xue,<sup>†</sup> Bibiao Jiang\*,<sup>†</sup> and

Guangzhao Zhang\*,<sup>‡</sup>

<sup>†</sup> School of Materials Science and Engineering, Changzhou University, Changzhou, P. R. China 213164;

<sup>‡</sup> Faculty of Materials Science and Engineering, South China University of Technology, Guangzhou, P. R. China 510640.

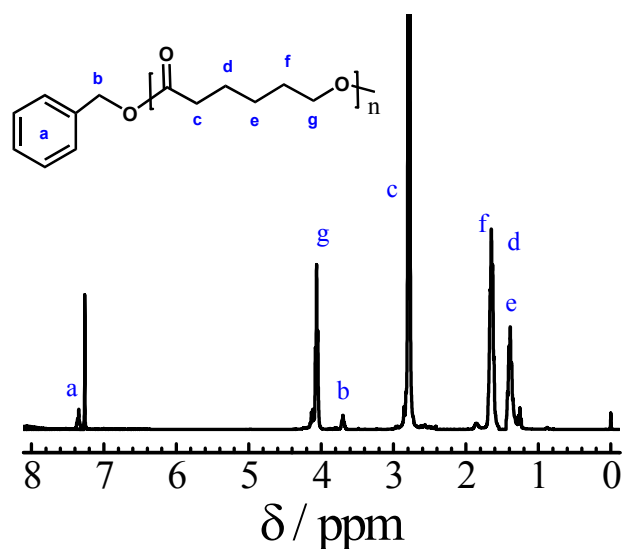

**Figure S1.**  $^1\text{H}$  NMR spectrum of PCL in  $\text{CDCl}_3$ .

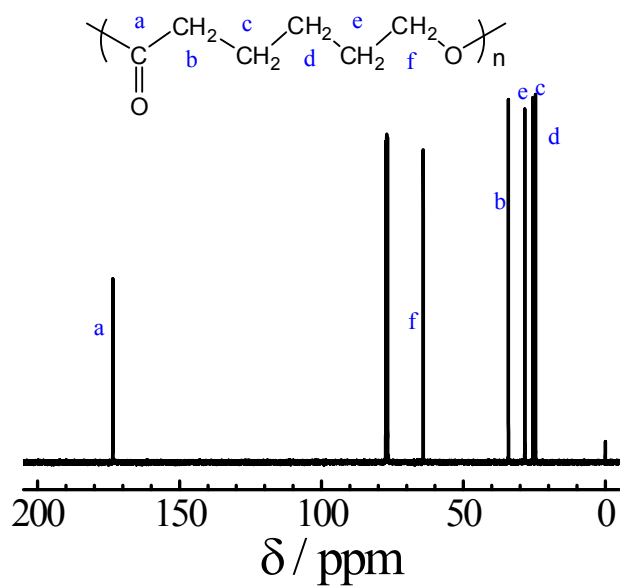

**Figure S2.**  $^{13}C$  NMR spectrum of PCL in  $CDCl_3$ .

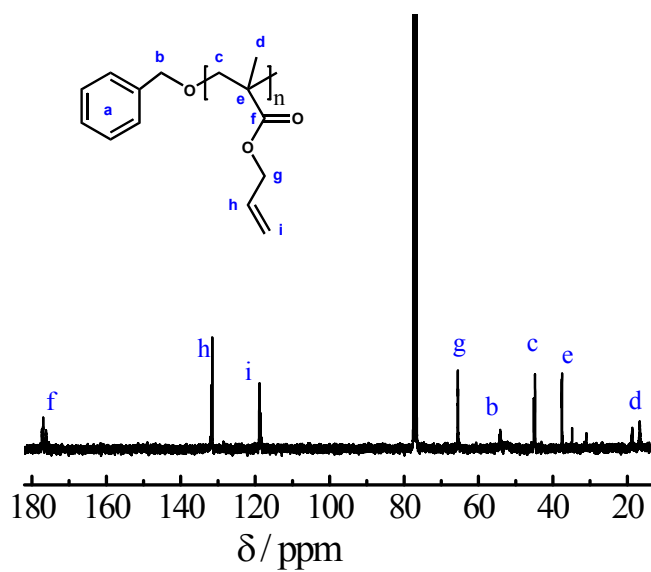

**Figure S3.**  $^{13}C$  NMR spectrum of PAMA in  $CDCl_3$ .
